# Supplementary material for: The Protective Effects of Shengmai Formula Against Myocardial Injury Induced by Ultrafine Particulate Matter Exposure and Myocardial Ischemia are Mediated by the PI3K/AKT/p38 MAPK/Nrf2 Pathway
Source: Front Pharmacol. 2021 Mar 8;12:619311. doi: 10.3389/fphar.2021.619311 (PMC7982744; doi:10.3389/fphar.2021.619311)
Supplement: Supplementary file 9 [file table4.xlsx]

## Sheet: Table S4
Table S4 Detailed information on putative targets of Shengmai formula
Herbs name	Gene symbol (before removing duplicates)	Gene symbol (after removing duplicates)
Dwarf Lilyturf Tuber	ABO	ABAT
Dwarf Lilyturf Tuber	ADH1B	ABO
Dwarf Lilyturf Tuber	AHR	ACACA
Dwarf Lilyturf Tuber	AKR1C3	ACACB
Dwarf Lilyturf Tuber	AKR1D1	ACHE
Dwarf Lilyturf Tuber	ANXA1	ACOT13
Dwarf Lilyturf Tuber	AR	acrB
Dwarf Lilyturf Tuber	ARF1	ADH1B
Dwarf Lilyturf Tuber	ATP1A1	ADH1C
Dwarf Lilyturf Tuber	ATP1A2	aglA
Dwarf Lilyturf Tuber	ATP1A3	aguA
Dwarf Lilyturf Tuber	AURKB	AGXT2
Dwarf Lilyturf Tuber	CASP3	AHR
Dwarf Lilyturf Tuber	CBR1	AKR1C1
Dwarf Lilyturf Tuber	GABRA1	AKR1C2
Dwarf Lilyturf Tuber	GABRA2	AKR1C3
Dwarf Lilyturf Tuber	GABRA3	AKR1D1
Dwarf Lilyturf Tuber	GABRA4	aldA
Dwarf Lilyturf Tuber	GABRA5	ALDH1L1
Dwarf Lilyturf Tuber	GABRA6	ALDH2
Dwarf Lilyturf Tuber	GABRB3	algQ1
Dwarf Lilyturf Tuber	GABRG1	algQ2
Dwarf Lilyturf Tuber	GABRG2	ALOX5
Dwarf Lilyturf Tuber	GABRG3	aly
Dwarf Lilyturf Tuber	GLRA3	AMN
Dwarf Lilyturf Tuber	GSTP1	AMT
Dwarf Lilyturf Tuber	HPGDS	AMY2A
Dwarf Lilyturf Tuber	HSD11B1	AMY2B
Dwarf Lilyturf Tuber	HSD11B2	amyA
Dwarf Lilyturf Tuber	HSD3B1	amyE
Dwarf Lilyturf Tuber	IL1B	amyM
Dwarf Lilyturf Tuber	IL6	amyP
Dwarf Lilyturf Tuber	ISYNA1	ANXA1
Dwarf Lilyturf Tuber	ITPR1	AR
Dwarf Lilyturf Tuber	KYNU	araC
Dwarf Lilyturf Tuber	LPL	araF
Dwarf Lilyturf Tuber	MIF	ARF1
Dwarf Lilyturf Tuber	MTTP	argG
Dwarf Lilyturf Tuber	NAGA	arnA
Dwarf Lilyturf Tuber	NCOA1	ATIC
Dwarf Lilyturf Tuber	NFKB1	ATP1A1
Dwarf Lilyturf Tuber	NFKB2	ATP1A2
Dwarf Lilyturf Tuber	NR1I3	ATP1A3
Dwarf Lilyturf Tuber	NR3C1	ATP2A1
Dwarf Lilyturf Tuber	PAEP	ATP6V1C1
Dwarf Lilyturf Tuber	PAPSS1	atpE
Dwarf Lilyturf Tuber	PIK3CA	AURKB
Dwarf Lilyturf Tuber	PIK3CG	B3GAT1
Dwarf Lilyturf Tuber	PIK3R1	BAMF_RS28815
Dwarf Lilyturf Tuber	PLA2G2E	BCAT2
Dwarf Lilyturf Tuber	PLK1	BCHE
Dwarf Lilyturf Tuber	PPARD	BCL2
Dwarf Lilyturf Tuber	PPP1CC	bfr
Dwarf Lilyturf Tuber	PREP	bioB
Dwarf Lilyturf Tuber	RARG	bioD
Dwarf Lilyturf Tuber	RORA	bioD1
Dwarf Lilyturf Tuber	RXRA	BLLF1
Dwarf Lilyturf Tuber	SERPINA1	CACNA1A
Dwarf Lilyturf Tuber	SHBG	CACNA1B
Dwarf Lilyturf Tuber	SLC25A4	CACNA1C
Dwarf Lilyturf Tuber	SLCO1B3	CACNA1D
Dwarf Lilyturf Tuber	SOAT1	CACNA1F
Dwarf Lilyturf Tuber	SOAT2	CACNA1G
Dwarf Lilyturf Tuber	TGFBR2	CACNA1H
Dwarf Lilyturf Tuber	TNF	CACNA1I
Dwarf Lilyturf Tuber	TOP2A	CACNA1S
Dwarf Lilyturf Tuber	TOP2B	CACNA2D1
Dwarf Lilyturf Tuber	TRDMT1	CACNA2D2
Dwarf Lilyturf Tuber	TRPA1	CACNA2D3
Dwarf Lilyturf Tuber	TRPM8	CACNB1
Dwarf Lilyturf Tuber	TRPV1	CACNB2
Dwarf Lilyturf Tuber	TRPV3	CACNB3
Dwarf Lilyturf Tuber	TUBA4A	CACNB4
Dwarf Lilyturf Tuber	TUBB	CACNG1
Dwarf Lilyturf Tuber	VDR	camC
Dwarf Lilyturf Tuber	YWHAE	CASP3
Dwarf Lilyturf Tuber	argG	cbh
Dwarf Lilyturf Tuber	bfr	cbhA
Dwarf Lilyturf Tuber	camC	CBR1
Dwarf Lilyturf Tuber	cc4	cc4
Dwarf Lilyturf Tuber	ccrA	ccrA
Dwarf Lilyturf Tuber	celCCG	cefE
Dwarf Lilyturf Tuber	csd	cel5A
Dwarf Lilyturf Tuber	dctD	celA1
Dwarf Lilyturf Tuber	def	celCCF
Dwarf Lilyturf Tuber	dhaK	celCCG
Dwarf Lilyturf Tuber	eno	CES1
Dwarf Lilyturf Tuber	fucI	cgt
Dwarf Lilyturf Tuber	gag-pol	CLEC4E
Dwarf Lilyturf Tuber	glcB	CNR1
Dwarf Lilyturf Tuber	glpF	CNR2
Dwarf Lilyturf Tuber	hisD	COMT
Dwarf Lilyturf Tuber	metE	COX4I1
Dwarf Lilyturf Tuber	mexA	COX5A
Dwarf Lilyturf Tuber	mutL	COX5B
Dwarf Lilyturf Tuber	mutY	COX6A2
Dwarf Lilyturf Tuber	nrdB	COX6B1
Dwarf Lilyturf Tuber	ntpK	COX6C
Dwarf Lilyturf Tuber	pbpX	COX7A1
Dwarf Lilyturf Tuber	pflB	COX7B
Dwarf Lilyturf Tuber	rhaA	COX7C
Dwarf Lilyturf Tuber	xylA	COX8A
Chinese Magnoliavine Fruit	AKR1C3	csd
Chinese Magnoliavine Fruit	ALOX5	cslA
Chinese Magnoliavine Fruit	AR	cslB
Chinese Magnoliavine Fruit	CACNA1A	ctaC
Chinese Magnoliavine Fruit	CACNA1B	ctaD
Chinese Magnoliavine Fruit	CACNA1C	CTRB1
Chinese Magnoliavine Fruit	CACNA1D	CUBN
Chinese Magnoliavine Fruit	CACNA1F	CYP11B2
Chinese Magnoliavine Fruit	CACNA1G	CYP17A1
Chinese Magnoliavine Fruit	CACNA1H	CYP19A1
Chinese Magnoliavine Fruit	CACNA1I	CYP1A1
Chinese Magnoliavine Fruit	CACNA1S	CYP1B1
Chinese Magnoliavine Fruit	CACNA2D1	DBI
Chinese Magnoliavine Fruit	CACNA2D2	dctD
Chinese Magnoliavine Fruit	CACNA2D3	DDX6
Chinese Magnoliavine Fruit	CACNB1	def
Chinese Magnoliavine Fruit	CACNB2	DGKA
Chinese Magnoliavine Fruit	CACNB3	dhaK
Chinese Magnoliavine Fruit	CACNB4	dhbE
Chinese Magnoliavine Fruit	CACNG1	DHFR
Chinese Magnoliavine Fruit	CASP3	DHFRL1
Chinese Magnoliavine Fruit	CNR1	DHRS4L1
Chinese Magnoliavine Fruit	CNR2	DKFZp686P18130
Chinese Magnoliavine Fruit	COMT	dlgD
Chinese Magnoliavine Fruit	CYP11B2	dmg
Chinese Magnoliavine Fruit	CYP17A1	DNMT1
Chinese Magnoliavine Fruit	CYP19A1	EDNRA
Chinese Magnoliavine Fruit	CYP1A1	EFTUD1
Chinese Magnoliavine Fruit	CYP1B1	eno
Chinese Magnoliavine Fruit	DGKA	entB
Chinese Magnoliavine Fruit	ESR1	env
Chinese Magnoliavine Fruit	ESR2	eryF
Chinese Magnoliavine Fruit	GABRA1	ESR1
Chinese Magnoliavine Fruit	GABRA2	ESR2
Chinese Magnoliavine Fruit	GABRA3	ESRRG
Chinese Magnoliavine Fruit	GABRA4	FAAH
Chinese Magnoliavine Fruit	GABRA5	fabG3
Chinese Magnoliavine Fruit	GABRA6	FABP6
Chinese Magnoliavine Fruit	GABRB1	fadH
Chinese Magnoliavine Fruit	GABRB2	FECH
Chinese Magnoliavine Fruit	GABRB3	folA
Chinese Magnoliavine Fruit	GABRD	folP
Chinese Magnoliavine Fruit	GABRE	FOLR1
Chinese Magnoliavine Fruit	GABRG1	FOLR2
Chinese Magnoliavine Fruit	GABRG2	FOLR3
Chinese Magnoliavine Fruit	GABRG3	FTCD
Chinese Magnoliavine Fruit	GABRP	fucI
Chinese Magnoliavine Fruit	GABRQ	GABRA1
Chinese Magnoliavine Fruit	HIF1A	GABRA2
Chinese Magnoliavine Fruit	HMGCR	GABRA3
Chinese Magnoliavine Fruit	HSD11B1	GABRA4
Chinese Magnoliavine Fruit	HSD17B1	GABRA5
Chinese Magnoliavine Fruit	HSD3B1	GABRA6
Chinese Magnoliavine Fruit	ITGAL	GABRB1
Chinese Magnoliavine Fruit	ITGB2	GABRB2
Chinese Magnoliavine Fruit	LPL	GABRB3
Chinese Magnoliavine Fruit	MAOB	GABRD
Chinese Magnoliavine Fruit	NFKB1	GABRE
Chinese Magnoliavine Fruit	NFKB2	GABRG1
Chinese Magnoliavine Fruit	NR1H4	GABRG2
Chinese Magnoliavine Fruit	NR1I2	GABRG3
Chinese Magnoliavine Fruit	NR3C1	GABRP
Chinese Magnoliavine Fruit	NR3C2	GABRQ
Chinese Magnoliavine Fruit	OPRK1	gag-pol
Chinese Magnoliavine Fruit	ORM1	galM
Chinese Magnoliavine Fruit	PGR	ganB
Chinese Magnoliavine Fruit	PPP2CA	GART
Chinese Magnoliavine Fruit	PPP2CB	gcvT
Chinese Magnoliavine Fruit	PRKCA	glcB
Chinese Magnoliavine Fruit	PRKCB	glpF
Chinese Magnoliavine Fruit	SCN2A	GLRA3
Chinese Magnoliavine Fruit	SCN4A	GLT6D1
Chinese Magnoliavine Fruit	SEC14L2	GLTP
Chinese Magnoliavine Fruit	SEC14L3	glyA
Chinese Magnoliavine Fruit	SEC14L4	GPBAR1
Chinese Magnoliavine Fruit	SHBG	GSTP1
Chinese Magnoliavine Fruit	SRD5A1	gudD
Chinese Magnoliavine Fruit	SRD5A2	HA
Chinese Magnoliavine Fruit	SRD5A3	HAO1
Chinese Magnoliavine Fruit	SULT2B1	HCAR2
Chinese Magnoliavine Fruit	TNF	HCAR3
Chinese Magnoliavine Fruit	TOP2A	HIF1A
Chinese Magnoliavine Fruit	TOP2B	HIF1AN
Chinese Magnoliavine Fruit	TRPA1	hisD
Chinese Magnoliavine Fruit	TRPM8	HLCS
Chinese Magnoliavine Fruit	TRPV1	HMGCR
Chinese Magnoliavine Fruit	TRPV3	HN
Chinese Magnoliavine Fruit	TUBA4A	HPGDS
Chinese Magnoliavine Fruit	TUBB	HSD11B1
Chinese Magnoliavine Fruit	VDR	HSD11B2
Chinese Magnoliavine Fruit	camC	HSD17B1
Chinese Magnoliavine Fruit	eryF	HSD17B11
Chinese Magnoliavine Fruit	onr	HSD3B1
Red Ginseng	ABAT	hylB
Red Ginseng	ABO	icd
Red Ginseng	ACACA	ICL1
Red Ginseng	ACACB	IGHG1
Red Ginseng	ACHE	IGHG2
Red Ginseng	ACOT13	IGKC
Red Ginseng	ADH1C	IL1B
Red Ginseng	AGXT2	IL6
Red Ginseng	AHR	ISYNA1
Red Ginseng	AKR1C1	ITGAL
Red Ginseng	AKR1C2	ITGB2
Red Ginseng	AKR1C3	ITPR1
Red Ginseng	AKR1D1	kcsA
Red Ginseng	ALDH1L1	ksi
Red Ginseng	ALDH2	KYNU
Red Ginseng	AMN	lacZ
Red Ginseng	AMT	LCN2
Red Ginseng	AMY2A	LCT
Red Ginseng	AMY2B	leuA
Red Ginseng	ANXA1	leuB
Red Ginseng	AR	LGALS3
Red Ginseng	ATIC	lgtC
Red Ginseng	ATP1A1	linB
Red Ginseng	ATP1A2	LPL
Red Ginseng	ATP1A3	lpxA
Red Ginseng	ATP2A1	LSS
Red Ginseng	ATP6V1C1	LTF
Red Ginseng	AURKB	malE
Red Ginseng	B3GAT1	malP
Red Ginseng	BAMF_RS28815	MAOB
Red Ginseng	BCAT2	MBL2
Red Ginseng	BCHE	MCCC1
Red Ginseng	BCL2	MCCC2
Red Ginseng	BLLF1	mdlB
Red Ginseng	CASP3	ME2
Red Ginseng	CBR1	metE
Red Ginseng	CES1	metH
Red Ginseng	CLEC4E	mexA
Red Ginseng	COX4I1	MIF
Red Ginseng	COX5A	MMAA
Red Ginseng	COX5B	MMAB
Red Ginseng	COX6A2	MMACHC
Red Ginseng	COX6B1	Moth_1208
Red Ginseng	COX6C	MT-CO1
Red Ginseng	COX7A1	MT-CO2
Red Ginseng	COX7B	MT-CO3
Red Ginseng	COX7C	MTFMT
Red Ginseng	COX8A	MTHFD1
Red Ginseng	CTRB1	MTHFD2
Red Ginseng	CUBN	MTHFR
Red Ginseng	DBI	MTR
Red Ginseng	DDX6	MTRR
Red Ginseng	DHFR	MTTP
Red Ginseng	DHFRL1	MUT
Red Ginseng	DHRS4L1	mutL
Red Ginseng	DKFZp686P18130	mutY
Red Ginseng	DNMT1	NAGA
Red Ginseng	EDNRA	NCOA1
Red Ginseng	EFTUD1	NCOA2
Red Ginseng	ESR1	nedA
Red Ginseng	ESR2	NFKB1
Red Ginseng	ESRRG	NFKB2
Red Ginseng	FAAH	NNMT
Red Ginseng	FABP6	nos
Red Ginseng	FECH	NQO2
Red Ginseng	FOLR1	NR1H4
Red Ginseng	FOLR2	NR1I2
Red Ginseng	FOLR3	NR1I3
Red Ginseng	FTCD	NR3C1
Red Ginseng	GABRA1	NR3C2
Red Ginseng	GABRA2	nrdB
Red Ginseng	GABRA3	ntpK
Red Ginseng	GABRA4	onr
Red Ginseng	GABRA5	OPRK1
Red Ginseng	GABRA6	ORM1
Red Ginseng	GABRB1	PAEP
Red Ginseng	GABRB2	panB
Red Ginseng	GABRB3	PAPSS1
Red Ginseng	GABRD	pbpX
Red Ginseng	GABRE	PC
Red Ginseng	GABRG1	PCCA
Red Ginseng	GABRG2	PCCB
Red Ginseng	GABRG3	PCYT1A
Red Ginseng	GABRP	PCYT1B
Red Ginseng	GABRQ	PDHB
Red Ginseng	GART	pflB
Red Ginseng	GLRA3	PGR
Red Ginseng	GLT6D1	phnA
Red Ginseng	GLTP	PHOSPHO1
Red Ginseng	GPBAR1	PIK3CA
Red Ginseng	GSTP1	PIK3CG
Red Ginseng	HA	PIK3R1
Red Ginseng	HAO1	PKLR
Red Ginseng	HCAR2	PKM
Red Ginseng	HCAR3	PLA2G1B
Red Ginseng	HIF1AN	PLA2G2E
Red Ginseng	HLCS	PLD1
Red Ginseng	HMGCR	PLD2
Red Ginseng	HN	PLK1
Red Ginseng	HSD11B1	pobA
Red Ginseng	HSD11B2	PPARD
Red Ginseng	HSD17B1	ppcA
Red Ginseng	HSD17B11	PPP1CC
Red Ginseng	HSD3B1	PPP2CA
Red Ginseng	ICL1	PPP2CB
Red Ginseng	IGHG1	PREP
Red Ginseng	IGHG2	PRKCA
Red Ginseng	IGKC	PRKCB
Red Ginseng	IL1B	PTGS1
Red Ginseng	IL6	PTGS2
Red Ginseng	ITGAL	ptr2
Red Ginseng	ITGB2	purN
Red Ginseng	LCN2	QPRT
Red Ginseng	LCT	RARG
Red Ginseng	LGALS3	rhaA
Red Ginseng	LPL	RHO
Red Ginseng	LSS	rmlC
Red Ginseng	LTF	RORA
Red Ginseng	MBL2	rraA
Red Ginseng	MCCC1	RXRA
Red Ginseng	MCCC2	SCN2A
Red Ginseng	ME2	SCN4A
Red Ginseng	MMAA	sdsA1
Red Ginseng	MMAB	SEC14L2
Red Ginseng	MMACHC	SEC14L3
Red Ginseng	MT-CO1	SEC14L4
Red Ginseng	MT-CO2	serA1
Red Ginseng	MT-CO3	SERPINA1
Red Ginseng	MTFMT	SHBG
Red Ginseng	MTHFD1	SHMT1
Red Ginseng	MTHFD2	SHMT2
Red Ginseng	MTHFR	SLC16A1
Red Ginseng	MTR	SLC16A2
Red Ginseng	MTRR	SLC16A3
Red Ginseng	MUT	SLC16A4
Red Ginseng	Moth_1208	SLC16A5
Red Ginseng	NCOA2	SLC16A6
Red Ginseng	NFKB1	SLC16A7
Red Ginseng	NFKB2	SLC16A8
Red Ginseng	NNMT	SLC19A2
Red Ginseng	NQO2	SLC25A4
Red Ginseng	NR1H4	SLC5A6
Red Ginseng	NR1I2	SLCO1B3
Red Ginseng	NR1I3	SOAT1
Red Ginseng	NR3C1	SOAT2
Red Ginseng	NR3C2	spoII
Red Ginseng	PC	SRC
Red Ginseng	PCCA	SRD5A1
Red Ginseng	PCCB	SRD5A2
Red Ginseng	PCYT1A	SRD5A3
Red Ginseng	PCYT1B	SULT2A1
Red Ginseng	PDHB	SULT2B1
Red Ginseng	PGR	TCN1
Red Ginseng	PHOSPHO1	tetX
Red Ginseng	PKLR	TGFBR2
Red Ginseng	PKM	THYA
Red Ginseng	PLA2G1B	TM0306
Red Ginseng	PLD1	TNF
Red Ginseng	PLD2	TOP2A
Red Ginseng	PPP1CC	TOP2B
Red Ginseng	PTGS1	TPK1
Red Ginseng	PTGS2	TRDMT1
Red Ginseng	QPRT	TREM1
Red Ginseng	RHO	treZ
Red Ginseng	RORA	TRPA1
Red Ginseng	SCN2A	TRPM8
Red Ginseng	SCN4A	TRPV1
Red Ginseng	SERPINA1	TRPV3
Red Ginseng	SHBG	TUBA4A
Red Ginseng	SHMT1	TUBB
Red Ginseng	SHMT2	tvaI
Red Ginseng	SLC16A1	tvaII
Red Ginseng	SLC16A2	TYMS
Red Ginseng	SLC16A3	TYR
Red Ginseng	SLC16A4	VC0232
Red Ginseng	SLC16A5	VDR
Red Ginseng	SLC16A6	xylA
Red Ginseng	SLC16A7	xylH
Red Ginseng	SLC16A8	xynC
Red Ginseng	SLC19A2	yngHB
Red Ginseng	SLC5A6	YWHAE
Red Ginseng	SLCO1B3
Red Ginseng	SRC
Red Ginseng	SULT2A1
Red Ginseng	SULT2B1
Red Ginseng	TCN1
Red Ginseng	THYA
Red Ginseng	TM0306
Red Ginseng	TNF
Red Ginseng	TOP2A
Red Ginseng	TPK1
Red Ginseng	TREM1
Red Ginseng	TUBA4A
Red Ginseng	TUBB
Red Ginseng	TYMS
Red Ginseng	TYR
Red Ginseng	VC0232
Red Ginseng	VDR
Red Ginseng	YWHAE
Red Ginseng	acrB
Red Ginseng	aglA
Red Ginseng	aguA
Red Ginseng	aldA
Red Ginseng	algQ1
Red Ginseng	algQ2
Red Ginseng	aly
Red Ginseng	amyA
Red Ginseng	amyE
Red Ginseng	amyM
Red Ginseng	amyP
Red Ginseng	araC
Red Ginseng	araF
Red Ginseng	arnA
Red Ginseng	atpE
Red Ginseng	bioB
Red Ginseng	bioD
Red Ginseng	bioD1
Red Ginseng	cbh
Red Ginseng	cbhA
Red Ginseng	cefE
Red Ginseng	cel5A
Red Ginseng	celA1
Red Ginseng	celCCF
Red Ginseng	celCCG
Red Ginseng	cgt
Red Ginseng	cslA
Red Ginseng	cslB
Red Ginseng	ctaC
Red Ginseng	ctaD
Red Ginseng	dhbE
Red Ginseng	dlgD
Red Ginseng	dmg
Red Ginseng	entB
Red Ginseng	env
Red Ginseng	fabG3
Red Ginseng	fadH
Red Ginseng	folA
Red Ginseng	folP
Red Ginseng	galM
Red Ginseng	ganB
Red Ginseng	gcvT
Red Ginseng	glcB
Red Ginseng	glyA
Red Ginseng	gudD
Red Ginseng	hylB
Red Ginseng	icd
Red Ginseng	kcsA
Red Ginseng	ksi
Red Ginseng	lacZ
Red Ginseng	leuA
Red Ginseng	leuB
Red Ginseng	lgtC
Red Ginseng	linB
Red Ginseng	lpxA
Red Ginseng	malE
Red Ginseng	malP
Red Ginseng	mdlB
Red Ginseng	metH
Red Ginseng	nedA
Red Ginseng	nos
Red Ginseng	panB
Red Ginseng	phnA
Red Ginseng	pobA
Red Ginseng	ppcA
Red Ginseng	ptr2
Red Ginseng	purN
Red Ginseng	rhaA
Red Ginseng	rmlC
Red Ginseng	rraA
Red Ginseng	sdsA1
Red Ginseng	serA1
Red Ginseng	spoII
Red Ginseng	tetX
Red Ginseng	thyA
Red Ginseng	treZ
Red Ginseng	tvaI
Red Ginseng	tvaII
Red Ginseng	xylH
Red Ginseng	xynC
Red Ginseng	yngHB
